# Supplementary material for: Spying on the boron–boron triple bond using spin–spin coupling measured from 11B solid-state NMR spectroscopy
Source: Royal Society of Chemistry journal article supplement (doi:10.1039/c5sc00644a), 2015-01-01
Supplement: c5sc00644a1.pdf [file c5sc00644a1.pdf]

## **ELECTRONIC SUPPLEMENTARY INFORMATION**

### **Spying on the Boron-Boron Triple Bond Using Spin-Spin Coupling Measured from $^{11}\text{B}$ Solid-State NMR Spectroscopy**

Frédéric A. Perras,<sup>1,§</sup> William C. Ewing,<sup>2</sup> Theresa Dellermann,<sup>2</sup> Julian Böhnke,<sup>2</sup> Stefan Ullrich,<sup>2</sup>  
Thomas Schäfer,<sup>2</sup> Holger Braunschweig,<sup>2,\*</sup> and David L. Bryce<sup>1,\*</sup>

<sup>1</sup> Department of Chemistry and CCRI, University of Ottawa, 10 Marie Curie Pvt. D'Iorio Hall,  
Ottawa, Ontario K1N6N5, Canada.

<sup>2</sup> Institut für Anorganische Chemie, Julius-Maximilians-Universität Würzburg, Am Hubland,  
97074, Germany.

§Present Address: Ames Laboratory, U.S. Department of Energy, Ames, Iowa 50011, United  
States

\*Authors to whom correspondence may be addressed:

[dbryce@uottawa.ca](mailto:dbryce@uottawa.ca)

[h.braunschweig@uni-wuerzburg.de](mailto:h.braunschweig@uni-wuerzburg.de)

## Experimental

### Synthesis

Compounds **1**,<sup>1</sup> **2**,<sup>2</sup> **3**,<sup>3</sup> and **4**<sup>4</sup> were prepared as previously described.

### Solid-State NMR Spectroscopy

For all NMR experiments, the samples were packed into 4 mm o.d. MAS rotors under an inert atmosphere immediately prior to running the experiments. The experiments were performed using a Bruker AVANCE 500 NMR spectrometer using a Bruker triple-resonance 4 mm MAS probe. The <sup>11</sup>B *J*-resolved and DQF-*J*-resolved spectra were obtained using the previously published pulse sequences<sup>5,6</sup> and used 15  $\mu$ s central-transition selective 90° pulses and a DQF time of 4 to 6 ms. A 2 s recycle delay was used in all cases and the samples were spun at a 10 kHz MAS frequency. Between 25 and 42 *t*<sub>1</sub> increments of 500  $\mu$ s were performed for the 2D acquisition; between 128 and 2048 scans were acquired in each increment. The final spectra were obtained by magnitude processing.

---

<sup>1</sup> H. Braunschweig, R. D. Dewhurst, K. Hammond, J. Mies, K. Radacki, and A. Vargas, *Science*, 2012, **336**, 1420.

<sup>2</sup> J. Böhnke, H. Braunschweig, W. C. Ewing, C. Hörl, T. Kramer, I. Krummenacher, J. Mies, and A. Vargas, *Angew. Chem. Int. Ed.* 2014, **53**, 9082.

<sup>3</sup> P. Bissinger, H. Braunschweig, A. Damme, T. Kupfer and A. Vargas, *Angew. Chem. Int. Ed.* 2012, **51**, 9931.

<sup>4</sup> H. Braunschweig, R. D. Dewhurst, C. Hörl, A. K. Phukan, F. Pinzner and S. Ullrich, *Angew. Chem. Int. Ed.* 2014, **53**, 3241.

<sup>5</sup> F. A. Perras and D. L. Bryce, *J. Am. Chem. Soc.* 2013, **135**, 12596.

<sup>6</sup> F. A. Perras and D. L. Bryce, *J. Phys. Chem. Lett.* 2014, **5**, 4049.

## DFT Calculations

All DFT calculations were performed using the Amsterdam Density Functional program (ADF, ver. 2009).<sup>7</sup> DFT calculations were performed using the generalised gradient approximation (GGA) DFT functional of Perdew, Burke, and Ernzerhof (PBE)<sup>8</sup> using triple-zeta polarised Slater-type basis sets (TZP). The NBO/NLMO analysis was performed using the NBO 5.0 program,<sup>9</sup> which is included with ADF. The results of the NLMO decomposition of the  $J$  couplings are given in Table S1.

**Table S1.** Results from the NLMO analysis of the  $J(^{11}\text{B}, ^{11}\text{B})$  coupling constants

| Compound | $\sigma_{\text{BB}}$ contribution<br>to $J$ / % | $s_{\text{B}}$ contribution<br>to $J$ / % | $\sigma_{\text{BB}}$ s-character /<br>% | $\sigma_{\text{BB}}$ NBO energy<br>/ a.u. |
|----------|-------------------------------------------------|-------------------------------------------|-----------------------------------------|-------------------------------------------|
| <b>1</b> | 33.1                                            | 64.4                                      | 52.5                                    | -0.399                                    |
| <b>2</b> | 36.3                                            | 74.0                                      | 50.7                                    | -0.410                                    |
| <b>3</b> | 34.6                                            | 69.7                                      | 32.5                                    | -0.309                                    |
| <b>4</b> | 33.9                                            | 81.4                                      | 31.5                                    | -0.314                                    |

<sup>7</sup> G. te Velde, F. M. Bickelhaupt, E. J. Baerends, C. Fonseca Guerra, S. J. A. van Gisbergen, J. G. Snijders and T. Ziegler, *J. Comput. Chem.*, 2001, **22**, 931.

<sup>8</sup> J. P. Perdew, K. Burke, M. Ernzerhof, *Phys. Rev. Lett.* 1996, **77**, 3865.

<sup>9</sup> E. D. Glendening, J. K. Badenhoop, A. E. Reed, J. E. Carpenter, J. A. Bohmann, C. M. Morales and F. Weinhold, NBO 5.0., Theoretical Chemistry Institute, University of Wisconsin, Madison, WI, 2001.
